# Supplementary material
Source: Springer Nature journal article supplement (https://www.springermedizin.de/resource/supplementary/12891_2010_1067_MOESM1_ESM.pdf/9507630)

Pain intensity (100mm VAS)

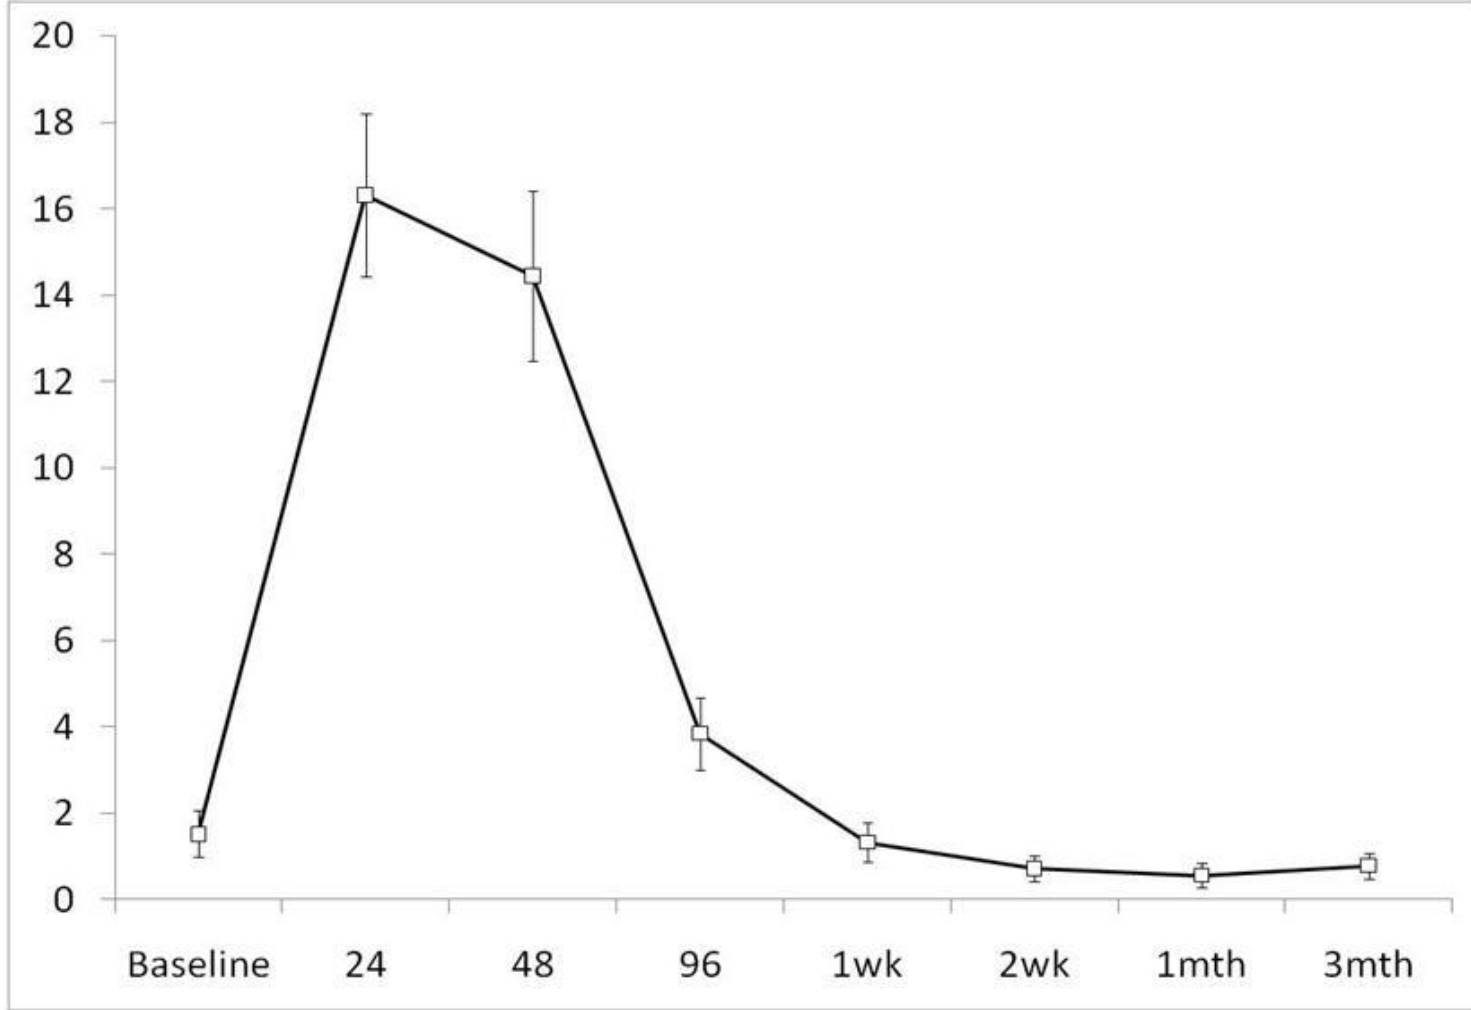

Supplement: MOESM1 [file 9507630]
